# Supplementary material for: Long-term Exposure to PM10 and NO2 in Association with Lung Volume and Airway Resistance in the MAAS Birth Cohort
Source: PubMed Central journal article supplement (PMC3801452; doi:10.1289/ehp.1205961), 2013-06-18
Supplement: ehp.1205961.s001.pdf [file ehp.1205961.s001.pdf]

## SUPPLEMENTAL MATERIAL

### Long-term Exposure to PM<sub>10</sub> and NO<sub>2</sub> in Association with Lung Volume and Airway Resistance in the MAAS Birth Cohort

Anna Mölter, Raymond M. Agius, Frank de Vocht, Sarah Lindley, William Gerrard, Lesley Lowe, Danielle Belgrave, Adnan Custovic, and Angela Simpson

#### CONTENTS

##### List of Tables

|                                                                                                                                                                                                        |   |
|--------------------------------------------------------------------------------------------------------------------------------------------------------------------------------------------------------|---|
| Table S1: Descriptive statistics of potential confounders not included in the final models .....                                                                                                       | 2 |
| Table S2 : Association between lifetime PM <sub>10</sub> and NO <sub>2</sub> exposure (in µg/m <sup>3</sup> ) and specific airway resistance at age 3, 5, 8 and 11 years <sup>a</sup> .....            | 6 |
| Table S3: Association between lifetime PM <sub>10</sub> and NO <sub>2</sub> exposure (in µg/m <sup>3</sup> ) and FEV <sub>1</sub> (% predicted) at age 5, 8 and 11 years <sup>a</sup> .....            | 7 |
| Table S4: Association between lifetime PM <sub>10</sub> and NO <sub>2</sub> exposure (in µg/m <sup>3</sup> ) and FEV <sub>1</sub> post bronchodilator (% predicted) at age 5 and 11 <sup>a</sup> ..... | 8 |

##### List of Figures

|                                                                                                                                                                                                                                                                                                                                                     |   |
|-----------------------------------------------------------------------------------------------------------------------------------------------------------------------------------------------------------------------------------------------------------------------------------------------------------------------------------------------------|---|
| Figure S1: Boxplots of estimated PM <sub>10</sub> exposures (µg/m <sup>3</sup> ) during the first year of life, one year prior to the review visit [derived from lifetime exposure model] and summer and winter before the age 11 review visit [derived from MEEM] (indicating the median, interquartile range, minimum, maximum and outliers)..... | 4 |
| Figure S2: Boxplots of estimated NO <sub>2</sub> exposures (µg/m <sup>3</sup> ) during the first year of life, one year prior to the review visit [derived from lifetime exposure model] and summer and winter before the age 11 review visit [derived from MEEM] (indicating the median, interquartile range, minimum, maximum and outliers).....  | 5 |

Table S1: Descriptive statistics of potential confounders not included in the final models

| Variable                                               | MAAS cohort at birth |           |                 | Children with longitudinal FEV <sub>1</sub> and longitudinal exposure data |           |                 | p <sup>a</sup> |
|--------------------------------------------------------|----------------------|-----------|-----------------|----------------------------------------------------------------------------|-----------|-----------------|----------------|
|                                                        | N                    | n or mean | (% or $\pm$ SD) | N                                                                          | n or mean | (% or $\pm$ SD) |                |
| Caucasian ethnicity                                    | 1115                 | 1059      | (95.0)          | 340                                                                        | 328       | (96.5)          | 0.131          |
| Older siblings                                         | 1073                 | 561       | (52.3)          | 341                                                                        | 179       | (52.5)          | 0.925          |
| Mother is atopic <sup>b</sup>                          | 1147                 | 683       | (59.5)          | 339                                                                        | 203       | (59.9)          | 0.881          |
| Father is atopic <sup>b</sup>                          | 1138                 | 717       | (63.0)          | 339                                                                        | 216       | (63.7)          | 0.746          |
| Maternal smoking during pregnancy                      | 1025                 | 119       | (11.6)          | 341                                                                        | 29        | (8.5)           | 0.028          |
| Any smoker living in the home                          |                      |           |                 |                                                                            |           |                 |                |
| first year of life                                     | 1024                 | 438       | (42.8)          | 341                                                                        | 143       | (41.9)          | 0.702          |
| age 3                                                  | 1080                 | 337       | (31.2)          | 329                                                                        | 90        | (27.4)          | 0.071          |
| age 5                                                  | 1094                 | 373       | (34.1)          | 340                                                                        | 102       | (30.0)          | 0.055          |
| age 8                                                  | 999                  | 366       | (36.6)          | 338                                                                        | 122       | (36.1)          | 0.799          |
| age 11                                                 | 896                  | 232       | (25.9)          | 335                                                                        | 80        | (23.9)          | 0.288          |
| Paternal income at birth                               |                      |           |                 |                                                                            |           |                 |                |
| <£10000                                                | 1078                 | 171       | (15.9)          | 324                                                                        | 47        | (14.5)          | 0.014          |
| £10000-£20000                                          | 1078                 | 406       | (37.7)          | 324                                                                        | 125       | (38.6)          |                |
| £20000-£30000                                          | 1078                 | 297       | (27.6)          | 324                                                                        | 106       | (32.7)          |                |
| >£30000                                                | 1078                 | 204       | (17.2)          | 324                                                                        | 46        | (14.2)          |                |
| Day-care attendance during the first two years of life | 1087                 | 741       | (68.2)          | 329                                                                        | 224       | (68.1)          | 0.969          |
| Dampness or mould in the home                          |                      |           |                 |                                                                            |           |                 |                |
| age 1                                                  | 1030                 | 177       | (17.2)          | 342                                                                        | 59        | (17.3)          | 0.968          |
| age 8                                                  | 1030                 | 149       | (14.5)          | 342                                                                        | 56        | (16.4)          | 0.220          |
| age 11                                                 | 930                  | 143       | (15.4)          | 342                                                                        | 50        | (14.6)          | 0.626          |
| Dog in the home                                        |                      |           |                 |                                                                            |           |                 |                |
| first year of life                                     | 1028                 | 174       | (16.9)          | 342                                                                        | 52        | (15.2)          | 0.299          |
| age 3                                                  | 1070                 | 150       | (14.0)          | 327                                                                        | 39        | (11.9)          | 0.191          |
| age 5                                                  | 1090                 | 168       | (15.4)          | 340                                                                        | 39        | (11.5)          | 0.015          |
| age 8                                                  | 1028                 | 198       | (19.3)          | 342                                                                        | 57        | (16.7)          | 0.136          |
| age 11                                                 | 930                  | 239       | (25.7)          | 342                                                                        | 81        | (23.7)          | 0.284          |
| Cat in the home                                        |                      |           |                 |                                                                            |           |                 |                |
| first year of life                                     | 1027                 | 205       | (20.0)          | 342                                                                        | 64        | (18.7)          | 0.480          |
| age 3                                                  | 1068                 | 208       | (19.5)          | 327                                                                        | 51        | (15.6)          | 0.033          |

| Variable                                                                                | MAAS cohort at birth |           |                 | Children with longitudinal FEV <sub>1</sub> and longitudinal exposure data |           |                 | p <sup>a</sup> |
|-----------------------------------------------------------------------------------------|----------------------|-----------|-----------------|----------------------------------------------------------------------------|-----------|-----------------|----------------|
|                                                                                         | N                    | n or mean | (% or $\pm$ SD) | N                                                                          | n or mean | (% or $\pm$ SD) |                |
| age 5                                                                                   | 1093                 | 216       | (19.8)          | 340                                                                        | 51        | (15.0)          | 0.008          |
| age 8                                                                                   | 1028                 | 217       | (21.1)          | 342                                                                        | 62        | (18.1)          | 0.098          |
| age 11                                                                                  | 930                  | 228       | (24.5)          | 342                                                                        | 78        | (22.8)          | 0.355          |
| Height (cm)                                                                             |                      |           |                 |                                                                            |           |                 |                |
| Girls                                                                                   |                      |           |                 |                                                                            |           |                 |                |
| age 3                                                                                   | 483                  | 95.0      | (3.6)           | 161                                                                        | 95.0      | (3.6)           | 0.945          |
| age 5                                                                                   | 465                  | 109.5     | (4.4)           | 171                                                                        | 109.8     | (4.6)           | 0.405          |
| age 8                                                                                   | 447                  | 127.6     | (5.4)           | 172                                                                        | 128.1     | (5.7)           | 0.295          |
| age 11                                                                                  | 386                  | 148.9     | (7.5)           | 173                                                                        | 149.6     | (7.9)           | 0.344          |
| Boys                                                                                    |                      |           |                 |                                                                            |           |                 |                |
| age 3                                                                                   | 562                  | 96.0      | (3.7)           | 160                                                                        | 96.1      | (3.7)           | 0.858          |
| age 5                                                                                   | 553                  | 110.4     | (4.5)           | 168                                                                        | 110.3     | (4.6)           | 0.731          |
| age 8                                                                                   | 528                  | 128.6     | (5.7)           | 167                                                                        | 128.4     | (5.5)           | 0.712          |
| age 11                                                                                  | 433                  | 147.6     | (7.8)           | 168                                                                        | 147.6     | (7.1)           | 0.989          |
| Weight (kg)                                                                             |                      |           |                 |                                                                            |           |                 |                |
| age 3                                                                                   | 1051                 | 15.3      | (1.9)           | 326                                                                        | 15.3      | (2.1)           | 0.880          |
| age 5                                                                                   | 1019                 | 19.9      | (2.9)           | 339                                                                        | 19.9      | (3.1)           | 0.735          |
| age 8                                                                                   | 976                  | 28.2      | (5.6)           | 339                                                                        | 28.3      | (6.0)           | 0.606          |
| age 11                                                                                  | 816                  | 42.4      | (10.4)          | 340                                                                        | 42.7      | (10.2)          | 0.707          |
| Birthweight (g)                                                                         | 1132                 | 3462      | (510)           | 330                                                                        | 3496      | (519)           | 0.302          |
| Gestational age (wks)                                                                   | 1072                 | 39.9      | (1.6)           | 314                                                                        | 39.9      | (1.6)           | 0.831          |
| Maternal age at birth (yrs)                                                             | 1115                 | 30.4      | (4.8)           | 329                                                                        | 31        | (4.6)           | 0.030          |
| Duration of breastfeeding (wks)                                                         | 1115                 | 15.5      | (20.0)          | 329                                                                        | 19.4      | (19.6)          | 0.002          |
| Short term NO <sub>2</sub> ( $\mu$ g/m <sup>3</sup> ) 3 day average before review visit |                      |           |                 |                                                                            |           |                 |                |
| age 3                                                                                   | 1081                 | 30.6      | (11.6)          | 326                                                                        | 29.9      | (11.3)          | 0.324          |
| age 5                                                                                   | 1044                 | 30.2      | (11.9)          | 340                                                                        | 30.4      | (12.1)          | 0.797          |
| age 8                                                                                   | 976                  | 28.6      | (10.0)          | 339                                                                        | 29.3      | (10.2)          | 0.243          |
| age 11                                                                                  | 805                  | 27.8      | (13.7)          | 337                                                                        | 27.8      | (13.4)          | 0.959          |

<sup>a</sup> p value of chi-square test or t-test comparing children with longitudinal FEV<sub>1</sub> and exposure data against all children in MAAS cohort at birth

<sup>b</sup> determined through skin prick test, mean wheal diameter 3mm greater than negative control for at least 1 out of 9 allergens tested

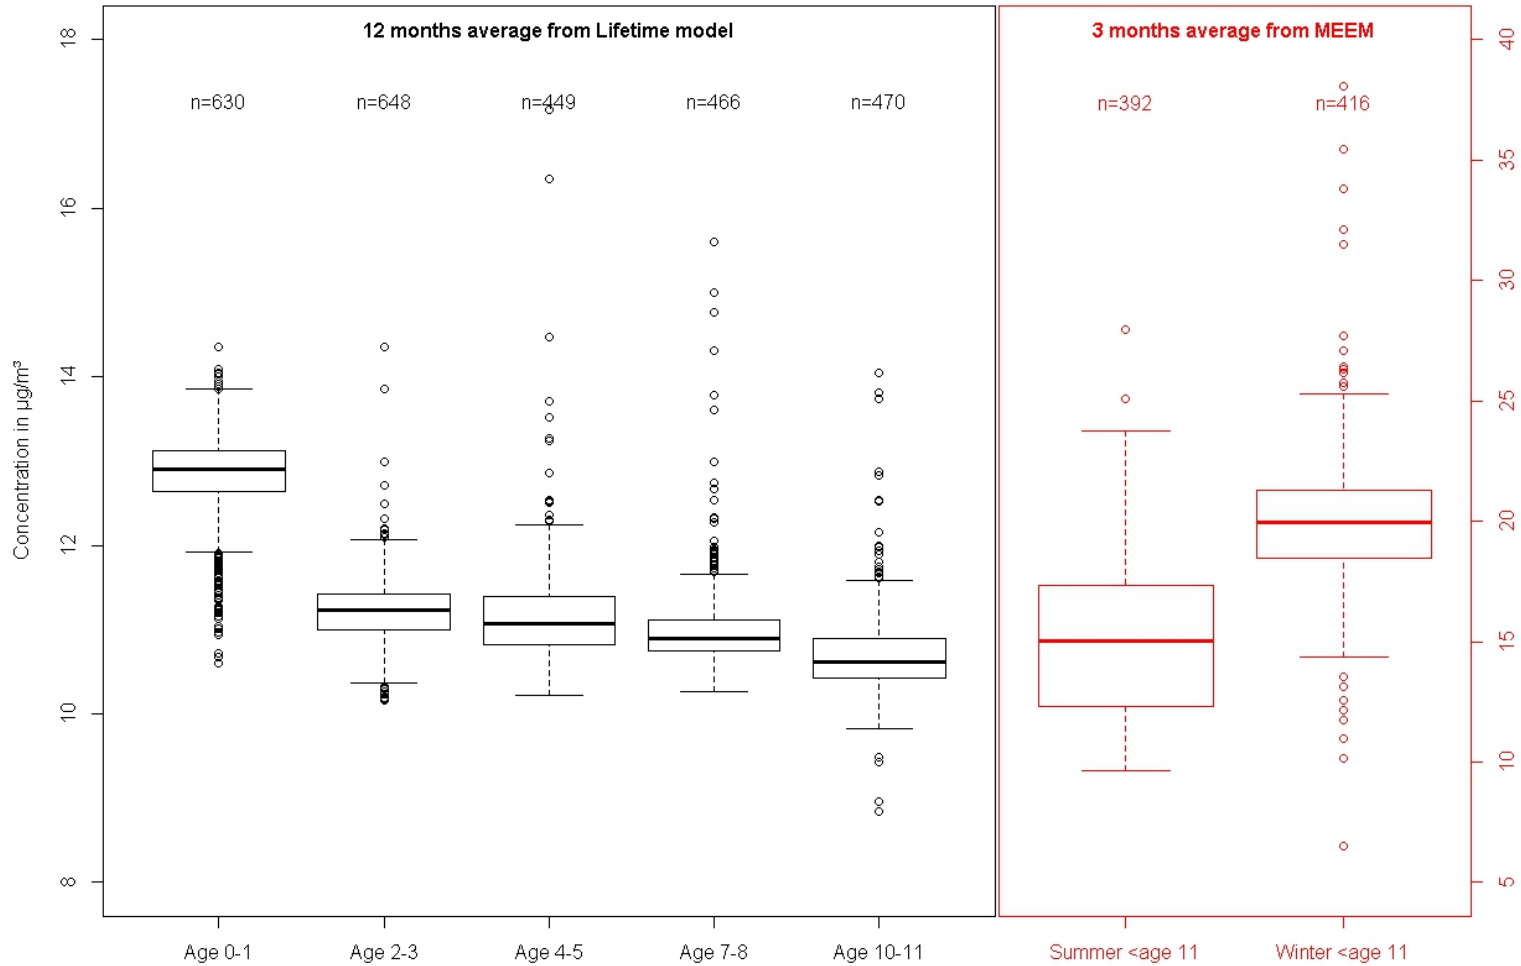

Figure S1: Boxplots of estimated PM<sub>10</sub> exposures ( $\mu\text{g}/\text{m}^3$ ) during the first year of life, one year prior to the review visit [derived from lifetime exposure model] and summer and winter before the age 11 review visit [derived from MEEM] (indicating the median, interquartile range, minimum, maximum and outliers)

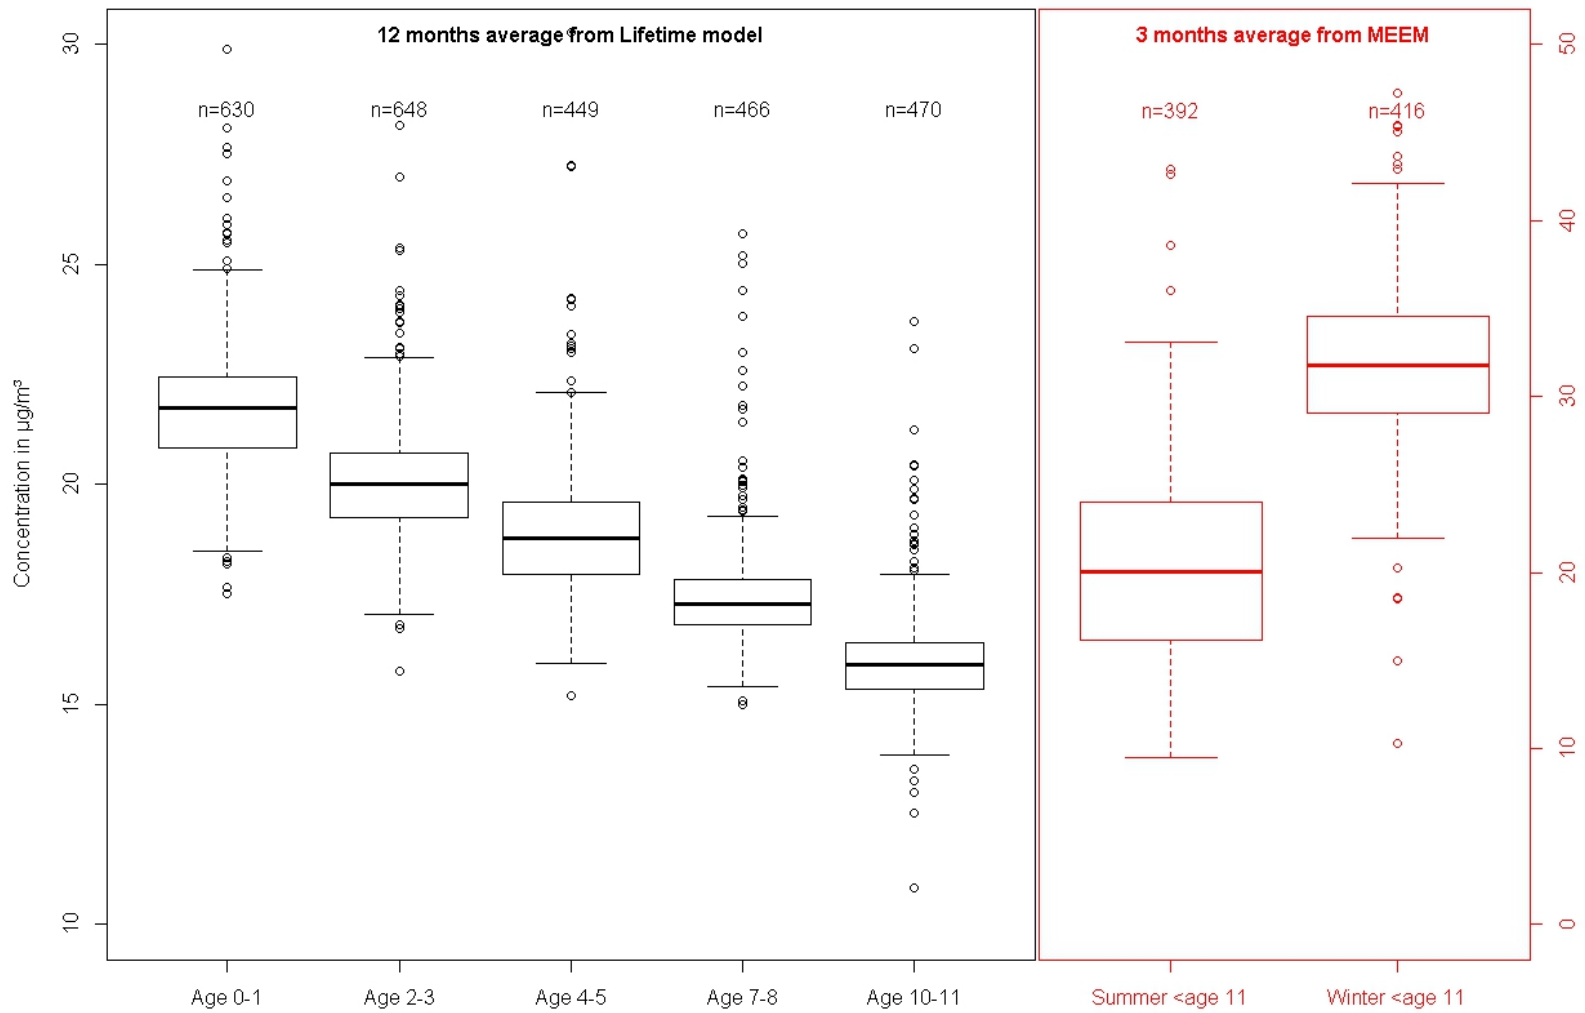

Figure S2: Boxplots of estimated NO<sub>2</sub> exposures (µg/m<sup>3</sup>) during the first year of life, one year prior to the review visit [derived from lifetime exposure model] and summer and winter before the age 11 review visit [derived from MEEM] (indicating the median, interquartile range, minimum, maximum and outliers)

Table S2: Association between lifetime PM<sub>10</sub> and NO<sub>2</sub> exposure (in µg/m<sup>3</sup>) and specific airway resistance at age 3, 5, 8 and 11 years<sup>a</sup>

| Exposure window | Outcome Age     | PM <sub>10</sub> |                  |       | NO <sub>2</sub> |                  |       | n <sup>d</sup> |
|-----------------|-----------------|------------------|------------------|-------|-----------------|------------------|-------|----------------|
|                 |                 | β <sup>c</sup>   | (95% CI)         | p     | β <sup>c</sup>  | (95% CI)         | p     |                |
| Age 0-1         |                 | -0.048           | (-0.090, -0.005) | 0.027 | -0.016          | (-0.031, 0.000)  | 0.053 | 339            |
| Age 0-3         | 3               | -0.056           | (-0.105, -0.008) | 0.023 | -0.017          | (-0.034, 0.000)  | 0.054 | 336            |
| Age 2-3         |                 | -0.021           | (-0.071, 0.030)  | 0.422 | -0.015          | (-0.031, 0.000)  | 0.056 | 353            |
| Age 0-1         |                 | -0.032           | (-0.059, -0.005) | 0.019 | -0.012          | (-0.023, -0.001) | 0.025 | 532            |
| Age 0-5         | 5               | -0.015           | (-0.056, 0.027)  | 0.490 | -0.012          | (-0.026, 0.002)  | 0.087 | 420            |
| Age 4-5         |                 | 0.021            | (-0.005, 0.047)  | 0.111 | 0.002           | (-0.009, 0.013)  | 0.710 | 398            |
| Age 0-1         |                 | 0.019            | (-0.012, 0.051)  | 0.232 | 0.006           | (-0.006, 0.018)  | 0.350 | 513            |
| Age 0-8         | 8               | 0.042            | (-0.010, 0.093)  | 0.116 | 0.013           | (-0.007, 0.034)  | 0.198 | 313            |
| Age 7-8         |                 | 0.010            | (-0.024, 0.045)  | 0.548 | 0.008           | (-0.007, 0.023)  | 0.281 | 405            |
| Age 0-1         |                 | -0.026           | (-0.070, 0.018)  | 0.251 | -0.010          | (-0.026, 0.007)  | 0.259 | 387            |
| Age 0-11        | 11 <sup>b</sup> | 0.008            | (-0.057, 0.074)  | 0.807 | 0.002           | (-0.024, 0.027)  | 0.905 | 285            |
| Age 10-11       |                 | -0.007           | (-0.054, 0.040)  | 0.774 | 0.002           | (-0.020, 0.023)  | 0.876 | 352            |

<sup>a</sup> Adjusted for age, gender, concurrent body mass index, concurrent atopy, concurrent asthma or current wheeze, family history of asthma, hospitalisation during the first two years of life for lower respiratory tract infection, average 3-day background PM<sub>10</sub> concentration prior to sRaw measurement

<sup>b</sup> Adjusted for Tanner stage <sup>c</sup> β coefficient per 1µg/m<sup>3</sup> increase in exposure <sup>d</sup> number of children included in analysis

Table S3: Association between lifetime PM<sub>10</sub> and NO<sub>2</sub> exposure (in µg/m<sup>3</sup>) and FEV<sub>1</sub> (% predicted) at age 5, 8 and 11 years<sup>a</sup>

| Exposure window | Outcome Age | PM <sub>10</sub> |               |       | NO <sub>2</sub> |               |       | n <sup>d</sup> |
|-----------------|-------------|------------------|---------------|-------|-----------------|---------------|-------|----------------|
|                 |             | β <sup>c</sup>   | (95% CI)      | p     | β <sup>c</sup>  | (95% CI)      | p     |                |
| Age 0-1         |             | -2.28            | (-4.64, 0.08) | 0.058 | -0.08           | (-0.97, 0.81) | 0.86  | 477            |
| Age 0-5         | 5           | -3.12            | (-6.48, 0.23) | 0.068 | -0.05           | (-1.17, 1.07) | 0.93  | 374            |
| Age 4-5         |             | -1.05            | (-3.11, 1.02) | 0.32  | -0.38           | (-1.25, 0.49) | 0.39  | 357            |
| Age 0-1         |             | 0.36             | (-1.52, 2.24) | 0.71  | 0.27            | (-0.46, 1.00) | 0.47  | 461            |
| Age 0-8         | 8           | -1.89            | (-4.87, 1.08) | 0.21  | -0.20           | (-1.4, 1.01)  | 0.75  | 278            |
| Age 7-8         |             | -0.02            | (-2.06, 2.01) | 0.98  | -0.19           | (-1.01, 0.71) | 0.68  | 359            |
| Age 0-1         |             | -0.31            | (-2.33, 1.71) | 0.77  | 0.04            | (-0.74, 0.82) | 0.92  | 413            |
| Age 0-11        | 11†         | -2.07            | (-5.12, 0.98) | 0.18  | -0.84           | (-2.03, 0.35) | 0.17  | 302            |
| Age 10-11       |             | -1.13            | (-3.36, 1.09) | 0.32  | -0.83           | (-1.79, 0.14) | 0.093 | 373            |

<sup>a</sup> Adjusted for concurrent atopy, concurrent asthma or current wheeze, hospitalisation for lower respiratory tract infection during the first two years of life, gas cooker in the home (age 8 and 11 only)

<sup>b</sup> Adjusted for Tanner stage

<sup>c</sup> β coefficient per 1 µg/m<sup>3</sup> increase in exposure

<sup>d</sup> number of children included in analysis

Table S4: Association between lifetime PM<sub>10</sub> and NO<sub>2</sub> exposure (in µg/m<sup>3</sup>) and FEV<sub>1</sub> post bronchodilator (% predicted) at age 5 and 11<sup>a</sup>

| Exposure window | Outcome Age | PM <sub>10</sub> |                |       | NO <sub>2</sub> |                |       | n <sup>d</sup> |
|-----------------|-------------|------------------|----------------|-------|-----------------|----------------|-------|----------------|
|                 |             | β <sup>c</sup>   | (95% CI)       | p     | β <sup>c</sup>  | (95% CI)       | p     |                |
| Age 0-1         |             | -3.00            | (-5.29, -0.71) | 0.010 | -0.91           | (-1.77, -0.05) | 0.037 | 439            |
| Age 0-5         | 5           | -4.70            | (-7.85, -1.55) | 0.004 | -0.87           | (-1.95, 0.21)  | 0.11  | 345            |
| Age 4-5         |             | 0.38             | (-1.65, 2.42)  | 0.71  | -0.52           | (-1.35, 0.30)  | 0.21  | 331            |
| Age 0-1         |             | -2.03            | (-4.06, 0.01)  | 0.051 | -0.59           | (-1.37, 0.20)  | 0.14  | 403            |
| Age 0-11        | 11†         | -2.34            | (-5.51, 0.84)  | 0.15  | -0.99           | (-2.24, 0.25)  | 0.12  | 295            |
| Age 10-11       |             | -1.71            | (-3.94, 0.53)  | 0.13  | -1.00           | (-1.96, -0.03) | 0.043 | 366            |

<sup>a</sup> Adjusted for concurrent atopy, concurrent asthma or current wheeze, hospitalisation for lower respiratory tract infection during the first two years of life, gas cooker in the home (age 11 only)

<sup>b</sup> Adjusted for Tanner stage

<sup>c</sup> β coefficient per 1µg/m<sup>3</sup> increase in exposure

<sup>d</sup> number of children included in analysis
